# Supplementary material for: A Hierarchical Network Approach for Modeling Rift Valley Fever Epidemics with Applications in North America
Source: PLOS journal article supplement (doi:10.1371/journal.pone.0062049), 2013-05-07
Supplement: S1 (10.1371/journal.pone.0062049.s001) [file journal.pone.0062049.s001]

## Supporting Information

The quantitative simulation results of different scenarios is shown in Table S1.

**Table S1. Quantitative simulation results of different scenarios.** We define that if there is at least one cattle infected, then the farm is infected. The number of infected farms is represented by  $A$  and the cumulative number of infected cattle throughout simulation is represented by  $B$ . The total number of infected cattle when the number of infected cattle farms is maximum ( $C$ ). The time to peak number of infected farms ( $D$ ) means the time it takes from the first day to the days on which the largest number of infected farms appears. Epidemic duration ( $E$ ) means the period with more than 60 infected cattle farms. The peak number of farms with more than one infected human is represented by  $F$  and the peak number of infected humans in a single farm in a day is represented by  $G$ . The total number of farms is 3526 and the total number of cattle in all farms is 303240.

| Farm size | Size of initial infection | Outcome characteristics | Initial <i>Aedes</i> eggs | source Adult <i>Aedes</i> | of Adult <i>Culex</i> | infection Cattle  |
|-----------|---------------------------|-------------------------|---------------------------|---------------------------|-----------------------|-------------------|
| Small     | few                       | $A$                     | 359                       | 319                       | 267                   | 183               |
|           |                           | $B$                     | $410 \times 10^3$         | $411 \times 10^3$         | $397 \times 10^3$     | $374 \times 10^3$ |
|           |                           | $C$                     | 16288                     | 6369                      | 4230                  | 2557              |
|           |                           | $D$                     | 1596                      | 1382                      | 1205                  | 1012              |
|           |                           | $E$                     | 444                       | 471                       | 592                   | 291               |
|           |                           | $F$                     | 0                         | 0                         | 0                     | 0                 |
|           |                           | $G$                     | 0                         | 0                         | 0                     | 0                 |
|           | many                      | $A$                     | 224                       | 437                       | 610                   | 388               |
|           |                           | $B$                     | $364 \times 10^3$         | $335 \times 10^3$         | $313 \times 10^3$     | $343 \times 10^3$ |
|           |                           | $C$                     | 1772                      | 3125                      | 4433                  | 2773              |
|           |                           | $D$                     | 701                       | 701                       | 700                   | 701               |
|           |                           | $E$                     | 278                       | 181                       | 217                   | 227               |
|           |                           | $F$                     | 0                         | 0                         | 0                     | 0                 |
|           |                           | $G$                     | 0                         | 0                         | 0                     | 0                 |
| Large     | few                       | $A$                     | 293                       | 197                       | 296                   | 342               |
|           |                           | $B$                     | $407 \times 10^3$         | $382 \times 10^3$         | $354 \times 10^3$     | $413 \times 10^3$ |
|           |                           | $C$                     | 2907                      | 3878                      | 2459                  | 4411              |
|           |                           | $D$                     | 1205                      | 1204                      | 711                   | 1382              |
|           |                           | $E$                     | 557                       | 443                       | 278                   | 467               |
|           |                           | $F$                     | 0                         | 0                         | 0                     | 0                 |
|           |                           | $G$                     | 0                         | 0                         | 0                     | 0                 |
|           | many                      | $A$                     | 631                       | 732                       | 745                   | 208               |
|           |                           | $B$                     | $315 \times 10^3$         | $321 \times 10^3$         | $332 \times 10^3$     | $385 \times 10^3$ |
|           |                           | $C$                     | 4251                      | 4689                      | 4428                  | 3778              |
|           |                           | $D$                     | 700                       | 655                       | 608                   | 1204              |
|           |                           | $E$                     | 226                       | 260                       | 276                   | 449               |
|           |                           | $F$                     | 0                         | 0                         | 0                     | 0                 |
|           |                           | $G$                     | 0                         | 0                         | 0                     | 0                 |

The outcome characteristics are classified into the following ranges.

very small ( $0 < A < 300$  or  $0 < B < 320 \times 10^3$  or  $0 < C < 3000$ ),  
small ( $300 \leq A < 350$  or  $320 \times 10^3 \leq B < 350 \times 10^3$  or  $3000 \leq C < 4000$ ),  
average ( $350 \leq A < 400$  or  $350 \times 10^3 \leq B < 380 \times 10^3$  or  $4000 \leq C < 4500$ ),  
large ( $400 \leq A < 600$  or  $380 \times 10^3 \leq B < 400 \times 10^3$  or  $4500 \leq C < 6000$ ),  
very large ( $A \geq 600$  or  $B \geq 400 \times 10^3$  or  $C \geq 6000$ ),  
very short or really large ( $0 < D < 700$  or  $0 < E < 250$ ),  
short ( $700 \leq D < 1000$  or  $250 \leq E < 300$ ),  
medium ( $1000 \leq D < 1200$  or  $300 \leq E < 450$ ),  
long ( $1200 \leq D < 1300$  or  $450 \leq E < 500$ ),  
very long ( $D \geq 1300$  or  $E \geq 500$ ).
